# Supplementary material for: Machine Learning Prediction of Treatment Response to Inhaled Corticosteroids in Asthma
Source: MDPI journal article supplement (doi:10.3390/jpm14030246), 2024-02-25

## Supplementary Materials

Supplementary Table S1. Description of study cohorts

| Dataset                                                                                      | Study participants                                                                   |
|----------------------------------------------------------------------------------------------|--------------------------------------------------------------------------------------|
| Childhood Asthma Management Program (CAMP)                                                   | Children 5-12 years of age with mild-to-moderate persistent asthma                   |
| Pediatric Asthma Controller Trial (PACT)                                                     | children 6-14 years of age with mild-to-moderate physician-diagnosed asthma          |
| Characterizing Response to Leukotriene Receptor Antagonist and Inhaled Corticosteroid (CLIC) | children 6-17 with mild-to-moderate asthma                                           |
| Asthma Clinical Research Network (ACRN)                                                      | Adults 18 to 65 years with physician-diagnosed asthma                                |
| Marshfield Clinic Personalized Medicine Research Project (PMRP)                              | Adults aged 18 and above who resided in 1 of 19 zip codes surrounding Marshfield, WI |
| Vanderbilt University Medical Center's BioVu program (BioVU)                                 | Patients at Vanderbilt University Medical Center                                     |

Supplementary Figure S1. Q-Q plot of GWAS p-values

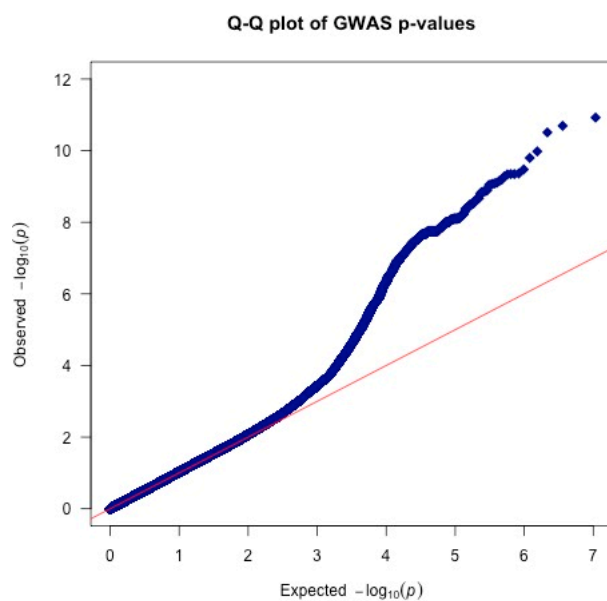

Supplementary Figure S2. Manhattan plot of GWAS

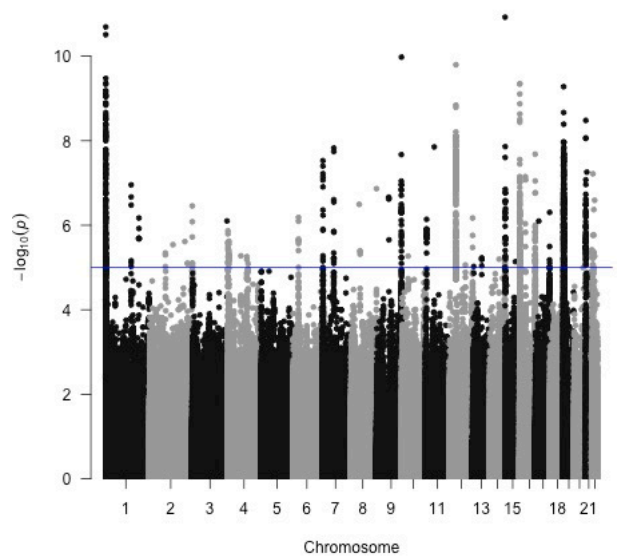

Supplementary Figure S3. Principal components of data by study group.

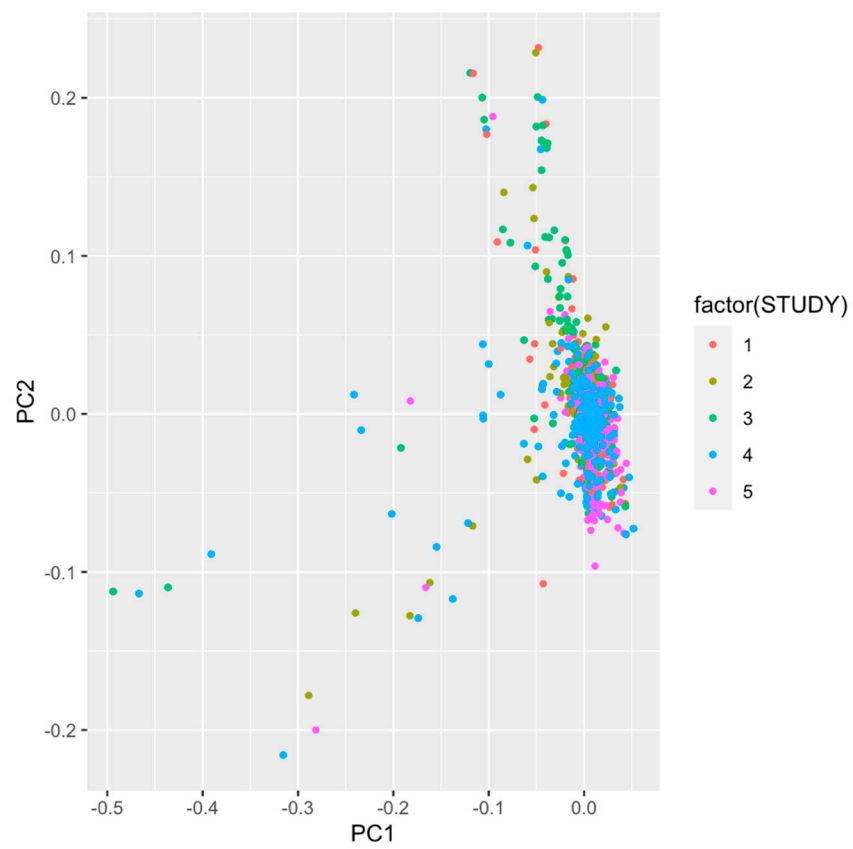

Supplement: s1 [file s1]
